# Supplementary material for: Fast and non-destructive Raman spectroscopic determination of multi-walled carbon nanotube (MWCNT) contents in MWCNT/polydimethylsiloxane composites
Source: Royal Society of Chemistry journal article supplement (doi:10.1039/c8an00351c), 2018-01-01
Supplement: c8an00351c1.pdf [file c8an00351c1.pdf]

## Electronic Supplementary Information (ESI)

### **Fast and non-destructive Raman spectroscopic determination of multi-wall carbon nanotube (MWCNT) content in MWCNT/polydimethylsiloxane composites**

**Donghyun Ryoo<sup>#</sup>, Jong Yun Kim<sup>#</sup>, Pham Khac Duy, Sang Hoon Cho, Hoeil Chung\*, and Tae Hyun Yoon\***

*Department of Chemistry and Research Institute for Convergence of Basic Sciences,  
Hanyang University, Seoul 133-791, Republic of Korea*

† Equal contribution authors.

\* Co-corresponding authors.

E-mail: [hoeil@hanyang.ac.kr](mailto:hoeil@hanyang.ac.kr) (Hoeil Chung); Fax: +82-2-2299-0762; Tel: +82-2-2220-0937,

E-mail: [taeyoon@hanyang.ac.kr](mailto:taeyoon@hanyang.ac.kr) (Tae Hyun Yoon); Tel: +82-2-2220-4593

**Table S1.** The parameters used for Monte Carlo simulation. The laser wavelength was 785 nm. The wavelengths 884, 877, and 883 nm correspond to the Raman peaks of PDMS, CNT, and Teflon, respectively.

| Wavelength (nm) | PDMS                                                |                                                              | CNT                                                 |                                                              | Teflon                                              |                                                              |
|-----------------|-----------------------------------------------------|--------------------------------------------------------------|-----------------------------------------------------|--------------------------------------------------------------|-----------------------------------------------------|--------------------------------------------------------------|
|                 | Absorption coefficient, $\mu_a$ (cm <sup>-1</sup> ) | Reduced scattering coefficient, $\mu'_s$ (cm <sup>-1</sup> ) | Absorption coefficient, $\mu_a$ (cm <sup>-1</sup> ) | Reduced scattering coefficient, $\mu'_s$ (cm <sup>-1</sup> ) | Absorption coefficient, $\mu_a$ (cm <sup>-1</sup> ) | Reduced scattering coefficient, $\mu'_s$ (cm <sup>-1</sup> ) |
| 785             | 0.20                                                | 7.21                                                         | $4.5 \times 10^5$                                   | 0                                                            | 0.01                                                | 165                                                          |
| 884             | 0.27                                                | 6.10                                                         | -                                                   | -                                                            | -                                                   | -                                                            |
| 877             | -                                                   | -                                                            | $4.2 \times 10^5$                                   | 0                                                            | -                                                   | -                                                            |
| 883             | -                                                   | -                                                            | -                                                   | -                                                            | 0.01                                                | 150                                                          |

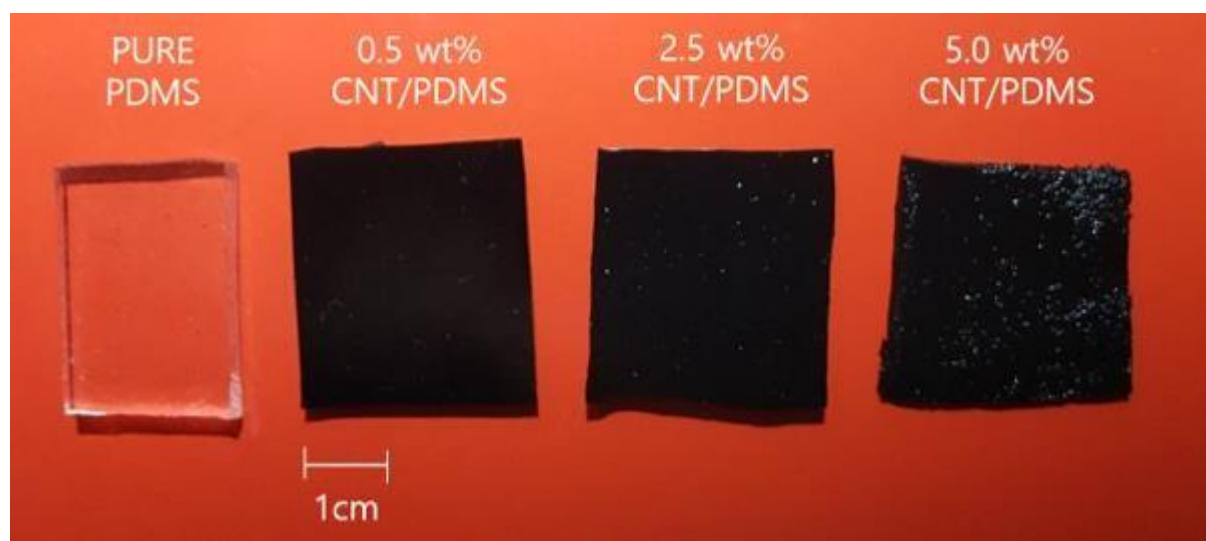

**Figure S1.** Pictures of pure PDMS and the 0.5, 2.5, and 5.0 wt% CNT/PDMS composites. The samples were placed on red paper to show their transparencies clearly.
